# Supplementary material for: Antioxidative activities of 62 wild mushrooms from Nepal and the phenolic profile of some selected species
Source: Springer Nature journal article supplement (doi:10.1007/s11418-016-1013-1), 2016-06-04
Supplement: MOESM3 [file 10241480]

a

19

17

10

11

2

9

13

20

4

7

6

5

8

12

14

15

18

21

1

3

16

b.

SN5 *Cyclomyces setiporus*

SN1 *Inonotus clemensiae*

c

5

4

2

11

10

8

5

14

17

4

UC3

UC2

UC1

d

SN7 *Cyclomyces setiporus*

SN6 *Cyclomyces setiporus*

e

f

SN8 *Cyclomyces setiporus*

SN3 *Inonotus* sp.

g

2

4

2

4

12

1

10

UC3

4

UC3

UC4

UC3

i

h

SN53 *Pseudomerulius curtisii*

SN9 *Cyclomyces setiporus*

19

SN14 *Ganoderma* sp.

SN54 *Xylobolus princeps*

k

j

3

Figure S2. HPLC chromatograms at 280 nm of the standard compounds (a) and ethanol extracts of the top ten samples with the highest TPC (b to k). The peaks were identified as 1. 5-sulfosalicylic acid, 2. gallic acid, 3. pyrogallol, 4. 3,4-dihydroxybenzoic acid, 5. chlorogenic acid, 6. (+)-catechin, 7. *p*-hydroxybenzoic acid, 8. vanillic acid, 9. caffeic acid, 10. vanillin, 11. rutin, 12. *p*-coumaric acid, 13. ferulic acid 14. veratric acid, 15. naringin, 16. benzoic acid, 17. abscisic acid, 18. quercetin, 19. *trans*-cinnamic acid, 20. naringenin, 21. kaempferol
